# Supplementary material
Source: publisher site journal article supplement (https://www.dovepress.com/article/241324)
Supplement: Supplementary file 1 [file get_supplementary_file.php]

Fig.S1


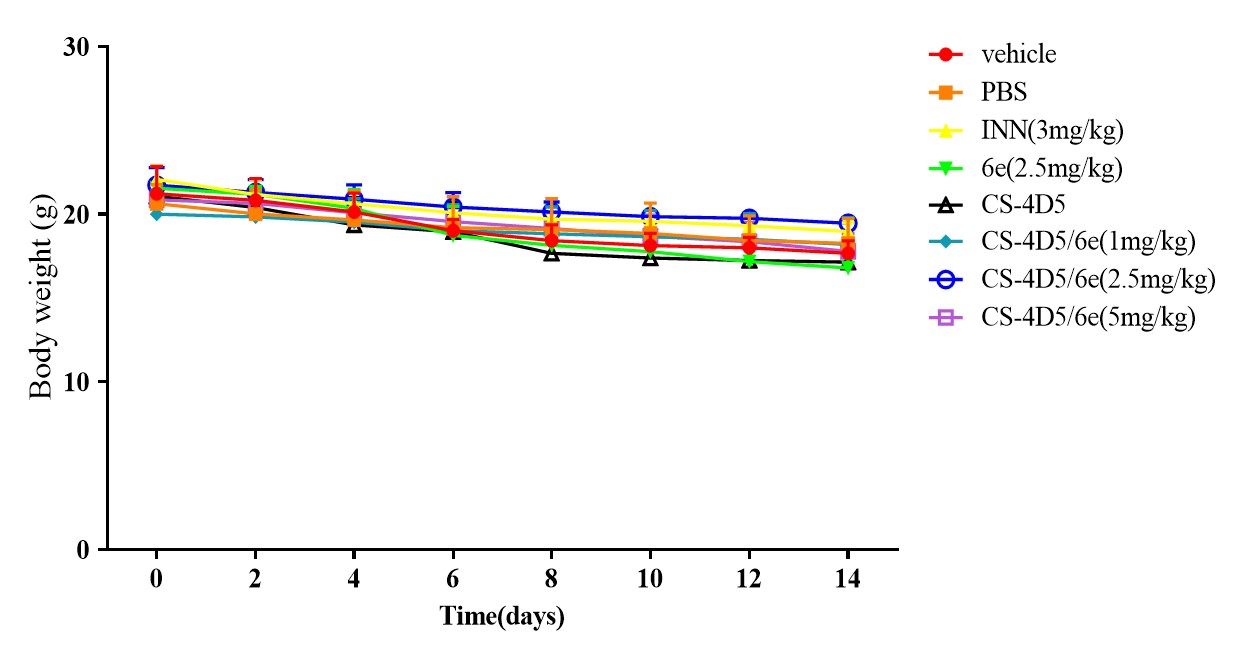


Fig.S2


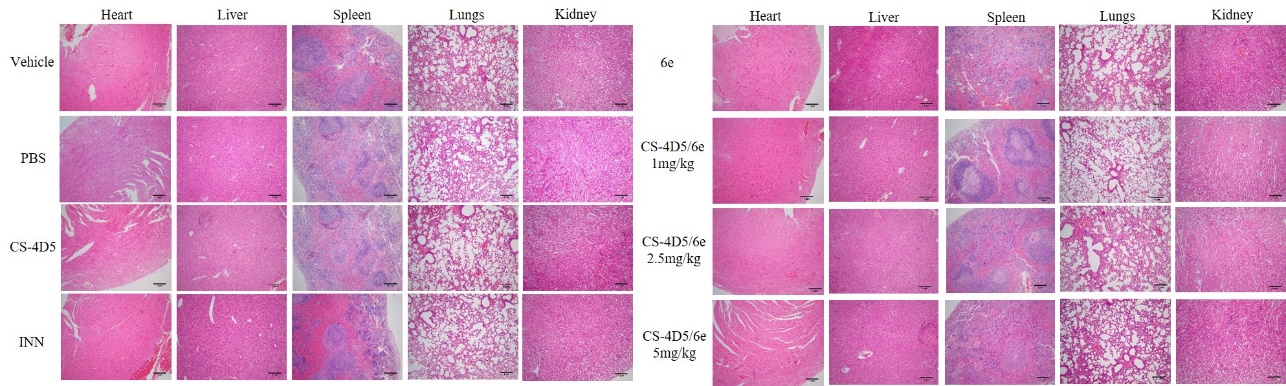


**Supplementary information legend**

Fig.S1:

Notes: Body weight of nude mice in each group for 14 days after administration. (n=6, means ± SD, ns means no significant difference *vs*. vehicle, P >0.05.)

Abbreviations: PBS: Phosphate Buffered Saline; INN: Indomethacin; CS: Chemically Chitosan;6e: A Derivative of Mansonone F; 4D5: Single Chain Antibody Fragment 4D5; SD: Standard Deviation.

Fig.S2:

Notes: H&E-stained slice images of major organs from different groups in nude mice.

Abbreviations: CS: Chemically Chitosan 4D5: Single Chain Antibody Fragment 4D5;6e: A Derivative of Mansonone F; INN: Indomethacin; PBS: Phosphate Buffered Saline; H&E: Hematoxylin and Eosin.
